# Supplementary material
Source: PubMed Central journal article supplement (PMC3259664)
Supplement: supp_M800350200_Lionaki_et_al_JBC_supplmat.pdf [file supp_M800350200_Lionaki_et_al_JBC_supplmat.pdf]

**THE ESSENTIAL FUNCTION OF TIM12 *IN VIVO* IS ENSURED BY THE  
ASSEMBLY INTERACTIONS OF ITS C-TERMINAL DOMAIN**

**Eirini Lionaki<sup>1,2,\*</sup>, Carine de Marcos Lousa<sup>1\*</sup>, Catherine Baud<sup>1</sup>, Maria  
Vougioukalaki<sup>1,2</sup>, George Panayotou<sup>3</sup> and Kostas Tokatlidis<sup>1,4</sup>**

From the <sup>1</sup>Institute of Molecular Biology and Biotechnology, Foundation for Research and Technology Hellas (IMBB-FORTH), Heraklion 71110, Crete, Greece, <sup>2</sup>Department of Biology, University of Crete, Heraklion 71409, Crete, Greece, <sup>3</sup>Biomedical Sciences Research Center "Alexander Fleming", Vari 16672, Greece, <sup>4</sup>Department of Materials Science and Technology, University of Crete, Heraklion 71003, Crete, Greece

\* Eirini Lionaki and Carine de Marcos Lousa have contributed equally to this work.

**SUPPLEMENTARY MATERIALS DOCUMENT**

Table 1: Constructs used in the study

| USE                            | Name                             | Cloning                                                      |
|--------------------------------|----------------------------------|--------------------------------------------------------------|
| Expression in <i>E. coli</i>   | pET28a Tim12                     | ORF (Nde1 – EcoR1)                                           |
| Expression in <i>E. coli</i>   | pET28a ΔN17Tim12                 | ORF (Nde1 – EcoR1)                                           |
| Expression in <i>E. coli</i>   | pET28a ΔN28Tim12                 | ORF (Nde1 – EcoR1)                                           |
| Expression in <i>E. coli</i>   | pRSETa ΔN28Tim12                 | ORF (BamH1 – EcoR1)                                          |
| Expression in <i>E. coli</i>   | pRSETa ΔC39Tim12                 | ORF (BamH1 – EcoR1)                                          |
| Expression in <i>E. coli</i>   | pGEX 4T-1 ΔC39Tim12              | ORF (BamH1 – EcoR1)                                          |
| Expression in <i>E. coli</i>   | pET28a ΔC18Tim12                 | ORF (Nde1 – EcoR1)                                           |
| Expression in <i>E. coli</i>   | pET28a Tim9                      | <del>{Vergnolle, 2007 #22}</del>                             |
| Expression in <i>E. coli</i>   | pRSETa Tim10                     | <del>{Vergnolle, 2007 #22}</del>                             |
| <i>In vitro</i> translation    | pSP64 Tim12                      | ORF (BamH1- EcoR1)                                           |
| <i>In vitro</i> translation    | pSP64 ΔN17Tim12                  | ORF (BamH1- EcoR1)                                           |
| <i>In vitro</i> translation    | pSP64 ΔN28Tim12                  | ORF (BamH1- EcoR1)                                           |
| <i>In vitro</i> translation    | pSP64 ΔC39Tim12                  | ORF (BamH1- EcoR1)                                           |
| <i>In vitro</i> translation    | pSP64 ΔC18Tim12                  | ORF (BamH1- EcoR1)                                           |
| <i>In vivo</i> complementation | pRS316 5' Tim12 3'               | 5' (HindIII-BamH1),<br>ORF (BamH1- EcoR1)<br>3' (EcoR1-Xba1) |
| <i>In vivo</i> complementation | pRS316 5' ΔN17Tim12 3'           | 5' (HindIII-BamH1)<br>ORF (BamH1- EcoR1)<br>3' (EcoR1-Xba1)  |
| <i>In vivo</i> complementation | pRS316 5' ΔN28Tim12 3'           | 5' (HindIII-BamH1)<br>ORF (BamH1- EcoR1)<br>3' (EcoR1-Xba1)  |
| <i>In vivo</i> complementation | pRS316 5' ΔC39Tim12 3'           | 5' (HindIII-BamH1)<br>ORF (BamH1- EcoR1)<br>3' (EcoR1-Xba1)  |
| <i>In vivo</i> complementation | pRS316 5' ΔC18Tim12 3'           | 5' (HindIII-BamH1)<br>ORF (BamH1- EcoR1)<br>3' (EcoR1-Xba1)  |
| <i>In vivo</i> complementation | pRS316 5' cyb2(1-85)ΔN28Tim12 3' | Cyb2(1-85) (BamH1-BamH1)<br>ΔN28Tim12 (BamH1-EcoR1)          |
| GAL1-10 TIM12 strain           | M4801                            | GAL 1-10 promoter_KANMX4 (ScaI-BamH1)                        |
| GAL1-10 TIM12 strain           | pSP64 5' Tim12                   | 5' (HindIII-BamH1)<br>ORF (BamH1-EcoR1)                      |
| GAL1-10 TIM12 strain           | pSP64 5' KANMX4 GAL1-10 TIM12    | KANMX4 GAL1-10                                               |

ref. 21  
ref. 21

**Table 2.** Oligonucleotides used in the study

| <b>Name</b>                      | <b>Sequence 5' to 3'</b>                                 |
|----------------------------------|----------------------------------------------------------|
| Tim12 forward BamH1              | CGG GAT CCA TGT CGT TCT TTT TAA ATA                      |
| Tim12 reverse EcoR1              | GGA ATT CCT ATT TTT TGG AAT CAT CAG                      |
| ΔN17 Tim12 forward               | CGGGATCCATGAAGCTAGACGTTGCAGGAGTG                         |
| ΔN28 Tim12 forward               | CGGGATCCATGIGCTCGACTTTCAAC                               |
| ΔC39 Tim12 reverse               | GGAATTCCTACATCTTTGCCACACATCTG                            |
| ΔC18 Tim12 reverse               | GGAATTCCTACTGATTCTCTGGCCCGAAAC                           |
| Tim12 promoter (5')<br>forward   | GCGCGCAAGCTTCTAAACTATTTGACCACCGC                         |
| Tim12 promoter (5')<br>reverse   | GCG CGC GGA TCC CTT TTC TTG GTG CAC TTT<br>AAT ATT ATA C |
| Tim12 terminator (3')<br>forward | GCGCGCGAATTCCTGTAAATATGAGGACTGTC                         |
| Tim12 terminator (3')<br>reverse | GCGCGCTCTAGACACCCAGCGCCTTACATACTTG                       |
| KANMX4 reverse                   | TGCATTTCTTTCCAGACTTG                                     |
| Cyb2 forward                     | CGGGATCCATGGGTATGCTAAAATACAAACC                          |
| Cyb2 (1-85) reverse              | GCGCGGATCCATCCAGTTTCGGCTC                                |
